# Supplementary material for: Bio-degradation of polyethylene waste by simultaneous use of two bacteria: Bacillus licheniformis for production of bio-surfactant and Lysinibacillus fusiformis for bio-degradation
Source: Royal Society of Chemistry journal article supplement (doi:10.1039/c5ra25128a), 2015-12-23
Supplement: c5ra25128a1.pdf [file c5ra25128a1.pdf]

[Type here]

## Supplementary Figure:

### **Bio-degradation of Polyethylene Waste by Simultaneous Use of Two Bacteria: *Bacillus licheniformis* for production of Bio-surfactant and *Lysinibacillus fusiformis* for Bio-degradation.**

ShritamaMukherjee<sup>a</sup>, UttamRoyChaudhuri<sup>b</sup>, Patit P. Kundu<sup>a\*</sup>

<sup>a</sup>Advanced Polymer Laboratory, Department of Polymer Science and Technology, University of Calcutta, 92 APC Road, Kolkata-9, West Bengal, India. Email ID: [ppk923@yahoo.com](mailto:ppk923@yahoo.com).

Telephone number: +913323525106

<sup>b</sup>Chemical Technology, University of Calcutta, 92 APC Road, Kolkata-9, West Bengal, India.

[Type here]

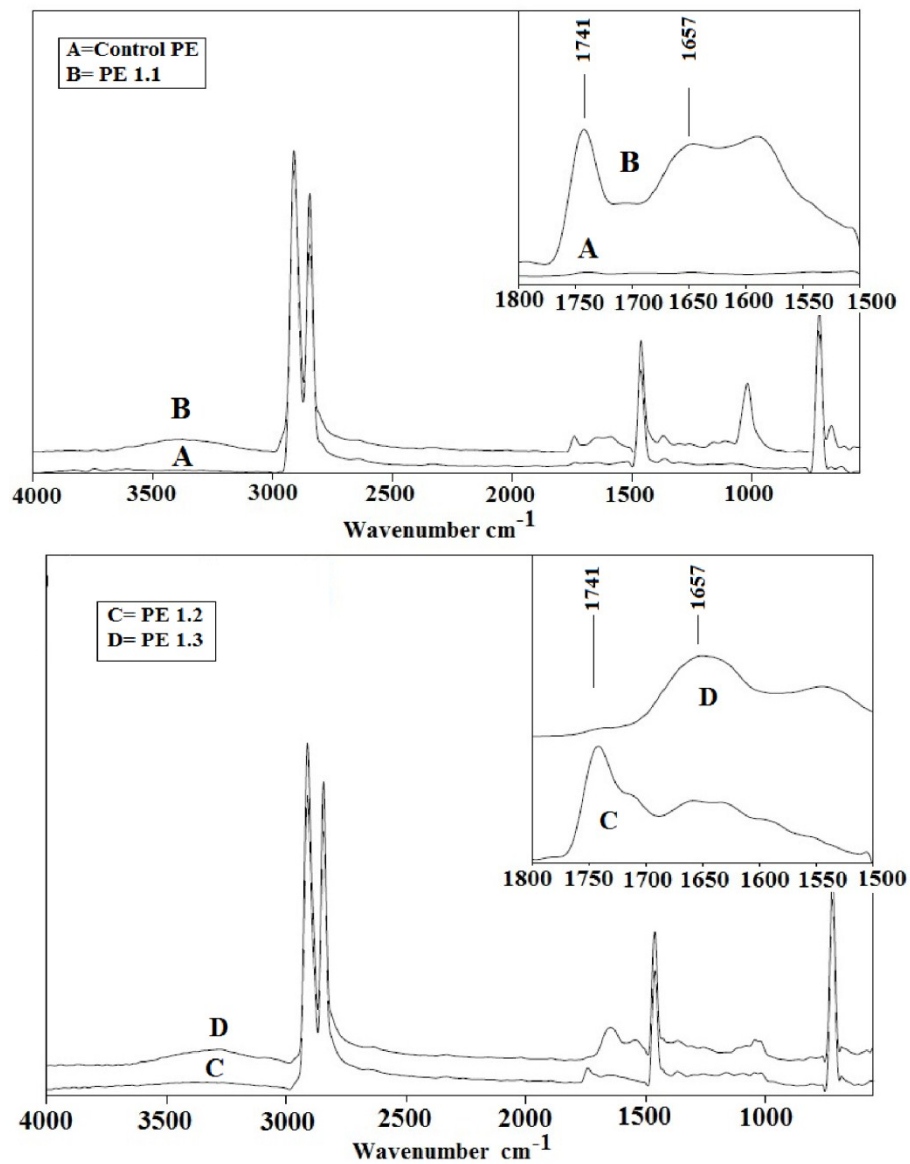

**Supplementary Figure S1:** Fourier transform infrared spectra of A-control polyethylene, B-PE 1.1, C-PE 1.2 , D- PE 1.3

[Type here]

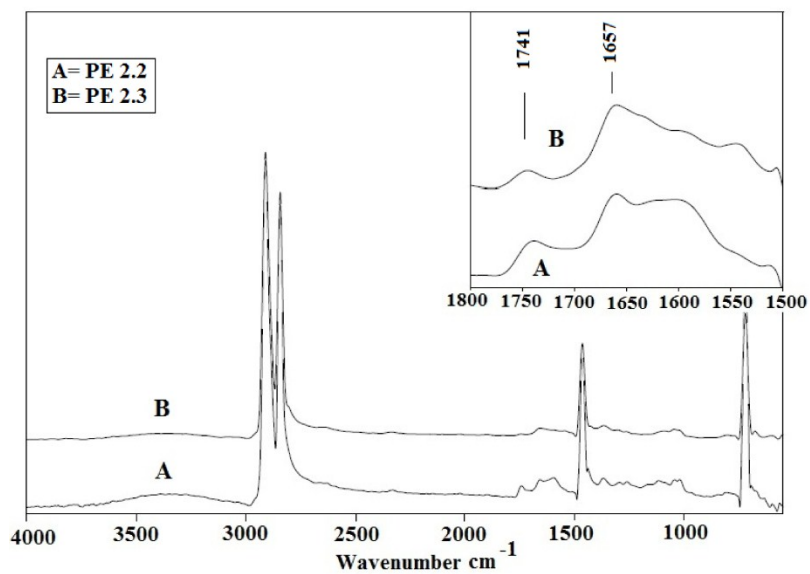

**Supplementary Figure S2:** Fourier transform infrared spectra of A- PE 2.2, B-PE 2.3

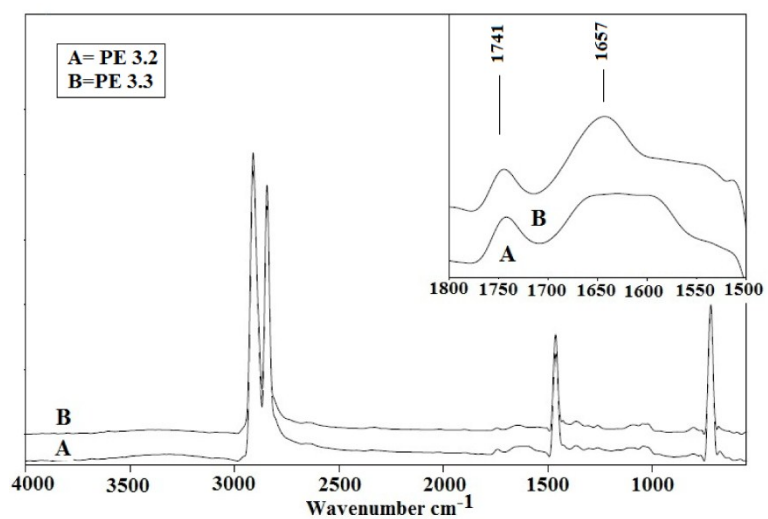

**Supplementary Figure S3:** Fourier transform infrared spectra of A- PE 3.2, B-PE 3.3

[Type here]

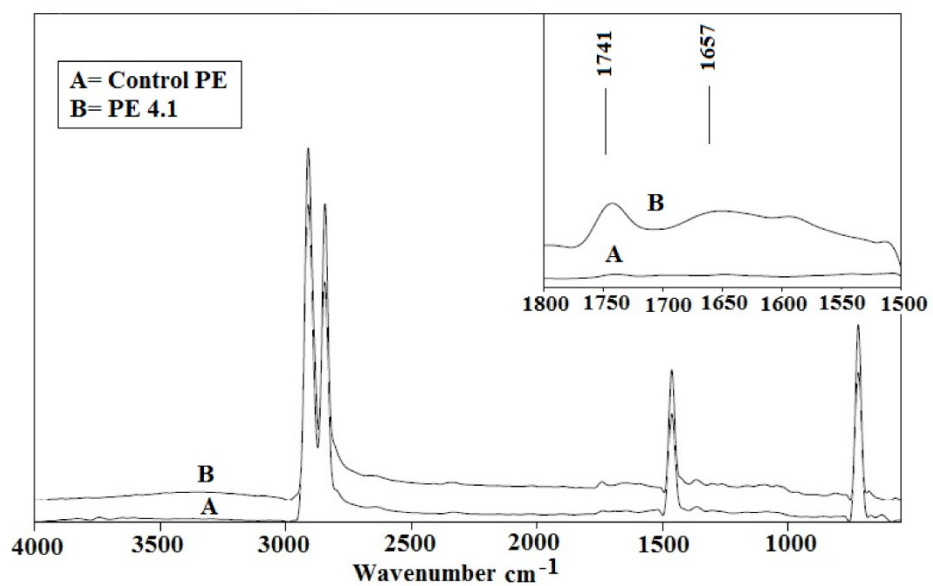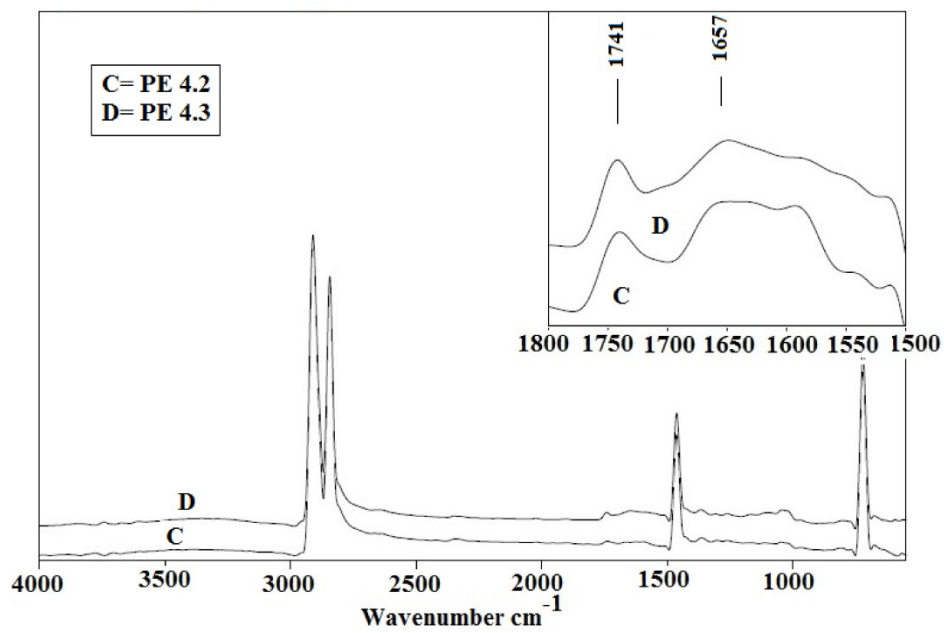

**Supplementary Figure S4:** Fourier transform infrared spectra of A-control PE, B-4.1, C-PE 4.2, D-PE 4.3

[Type here]

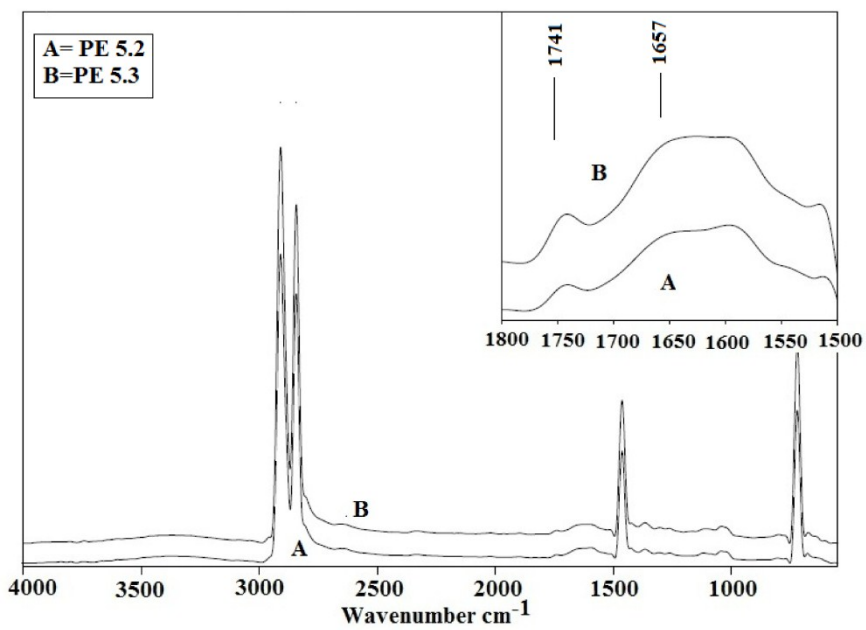

**Supplementary Figure S5:** Fourier transform infrared spectra of A: PE 5.2, B-PE 5.3

[Type here]

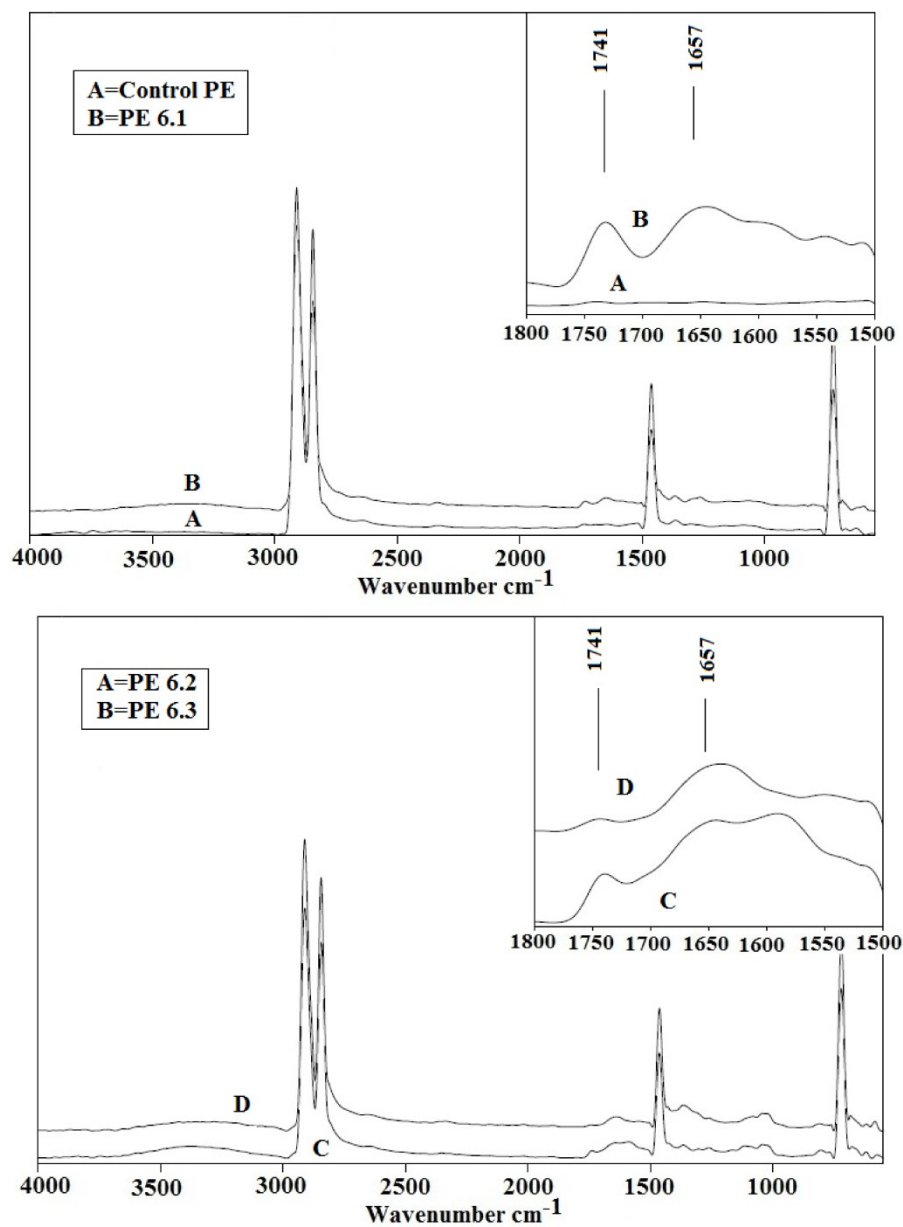

**Supplementary Figure S6:** Fourier transform infrared spectra of A-control polyethylene, B-PE 6.1, C-PE 6.2 , D- PE 6.3

[Type here]

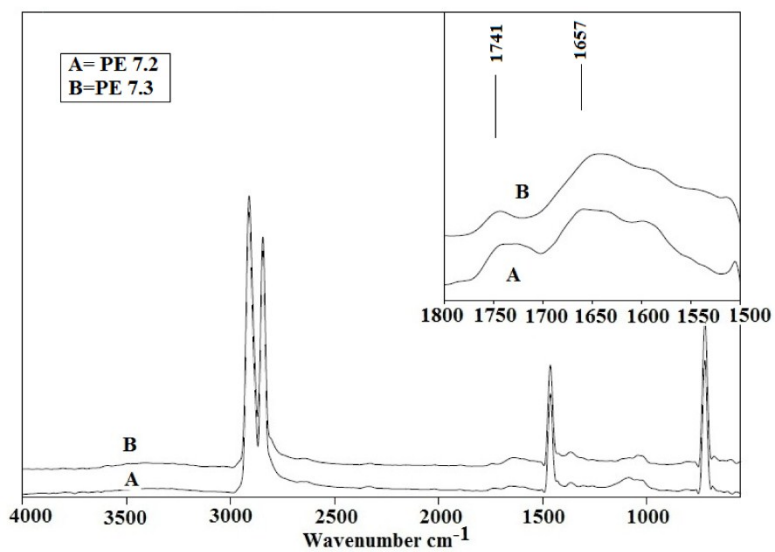

**Supplementary Figure S7:** Fourier transform infrared spectra of A- PE 7.2, B-PE 7.3

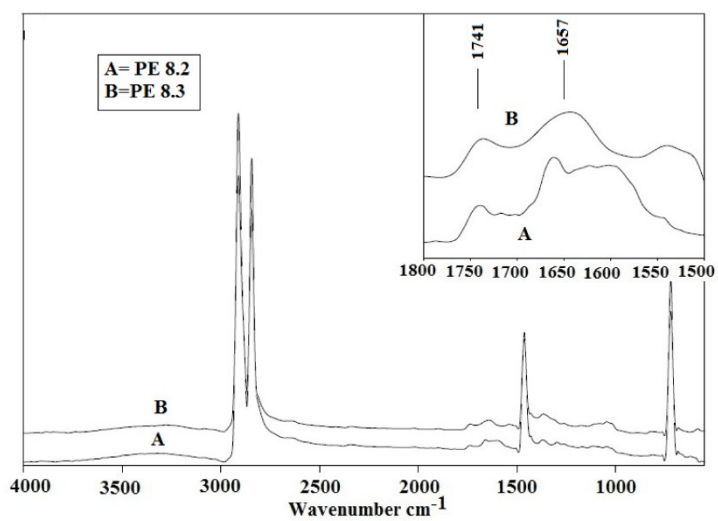

**Supplementary Figure S8:** Fourier transform infrared spectra of A- PE 8.2, B-PE 8.3
